# Supplementary material for: Cyclopentene and cyclopentadiene formation in isoprene pyrolysis
Source: Royal Society of Chemistry journal article supplement (doi:10.1039/d4cp02798a), 2024-01-01
Supplement: d4cp02798a1.pdf [file d4cp02798a1.pdf]

## Cyclopentene and Cyclopentadiene Formation in Isoprene Pyrolysis

Edgar White Buenger,<sup>a</sup> Andras Bodi,<sup>b</sup> Maxi A. Burgos-Paci<sup>c</sup> and Paul M Mayer<sup>a,\*</sup>

<sup>a</sup> Department of Chemistry and Biomolecular Sciences, University of Ottawa, Ottawa, Canada  
K1N 6N5

<sup>b</sup> Laboratory for Synchrotron Radiation and Femtochemistry, Paul Scherrer Institute, 5232  
Villigen, Switzerland

<sup>c</sup> INFIQC – CONICET, Departamento fisicoquímica, Universidad Nacional de Córdoba, Córdoba,  
Argentina

\*Corresponding author: Paul M Mayer, Department of Chemistry and Biomolecular Sciences,  
University of Ottawa, 10 Marie Curie, Ottawa, Canada K1N 6N5. [pmmayer@uottawa.ca](mailto:pmmayer@uottawa.ca)

Supporting Information

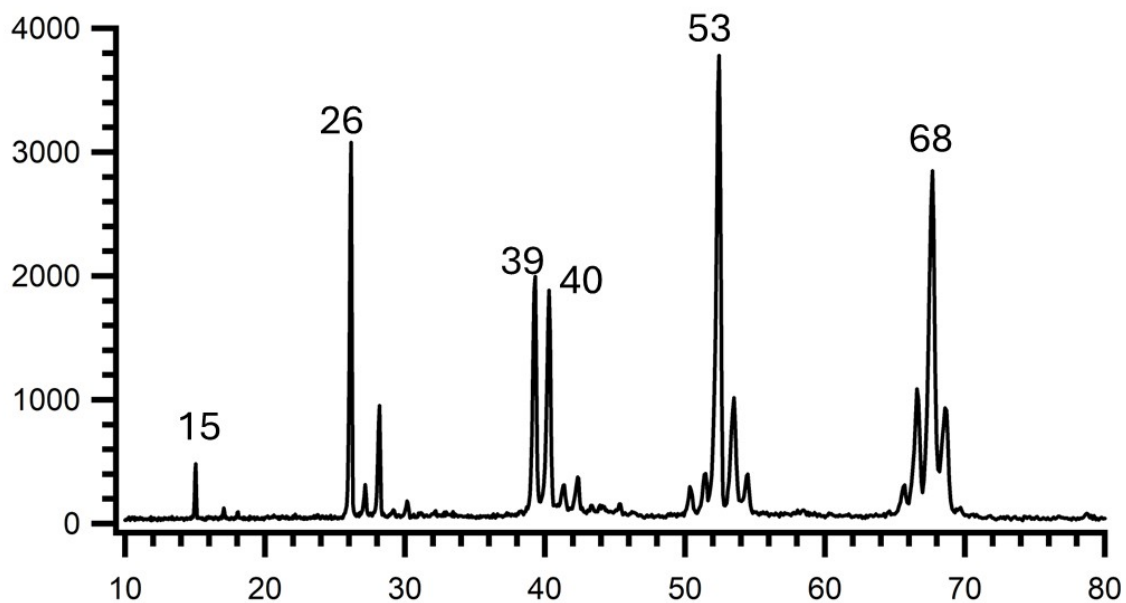

Fig. S1. Mass spectrum at 1400 °C and 12 eV photon energy in coincidence with all electrons (not only threshold ionization). Note that some ions, such as  $m/z$  67 and 53, are dissociation products of  $m/z$  68 and NOT due to the ionization of a neutral 67 Da species.

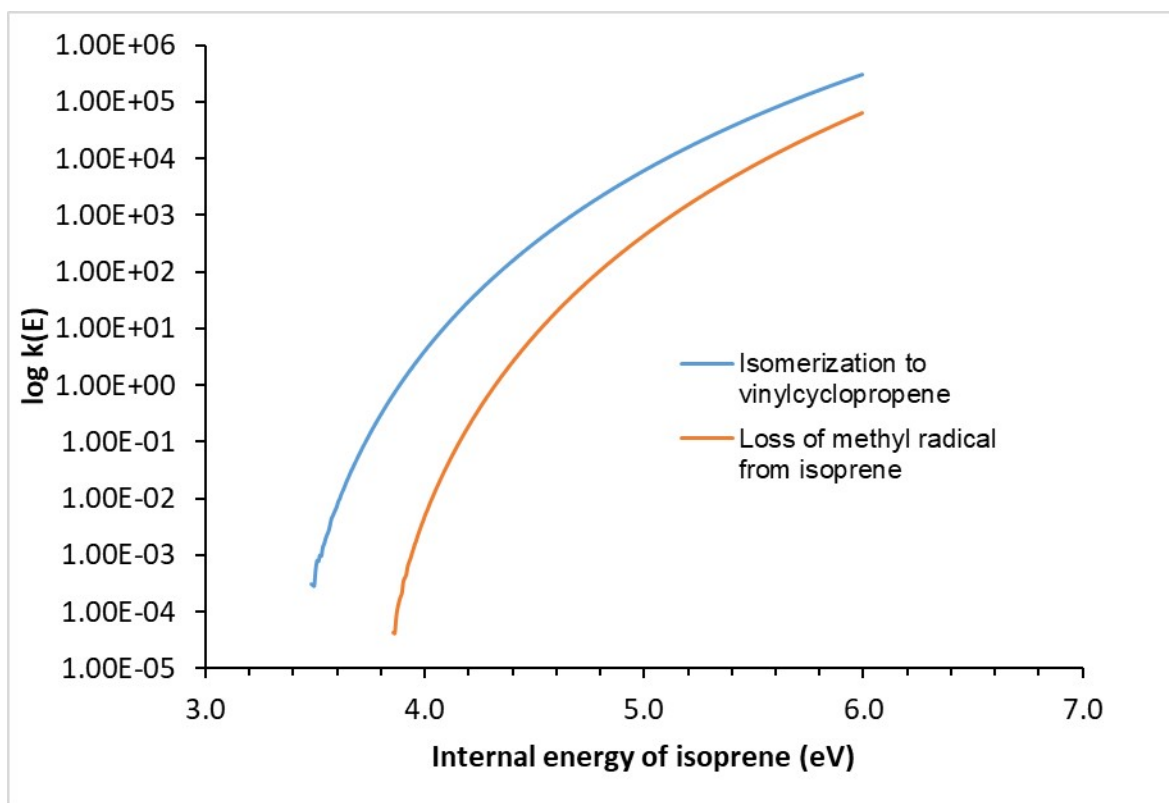

Fig. S2. Comparison of the  $k(E)$  vs  $E$  curves for isomerization to cyclopentene (via vinylcyclopropene) and direct methyl loss from isoprene.

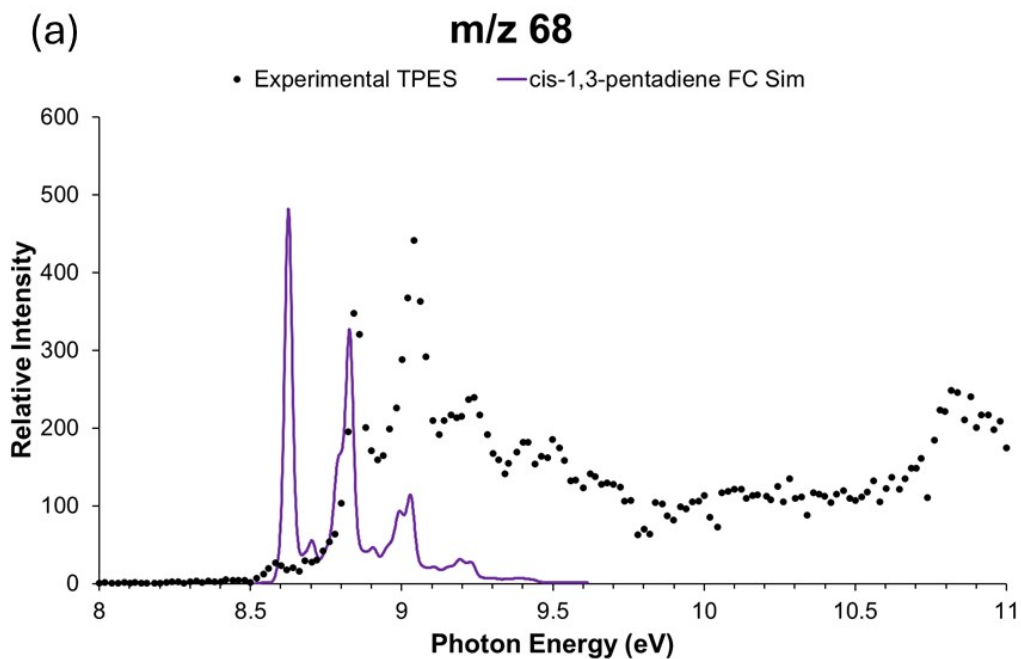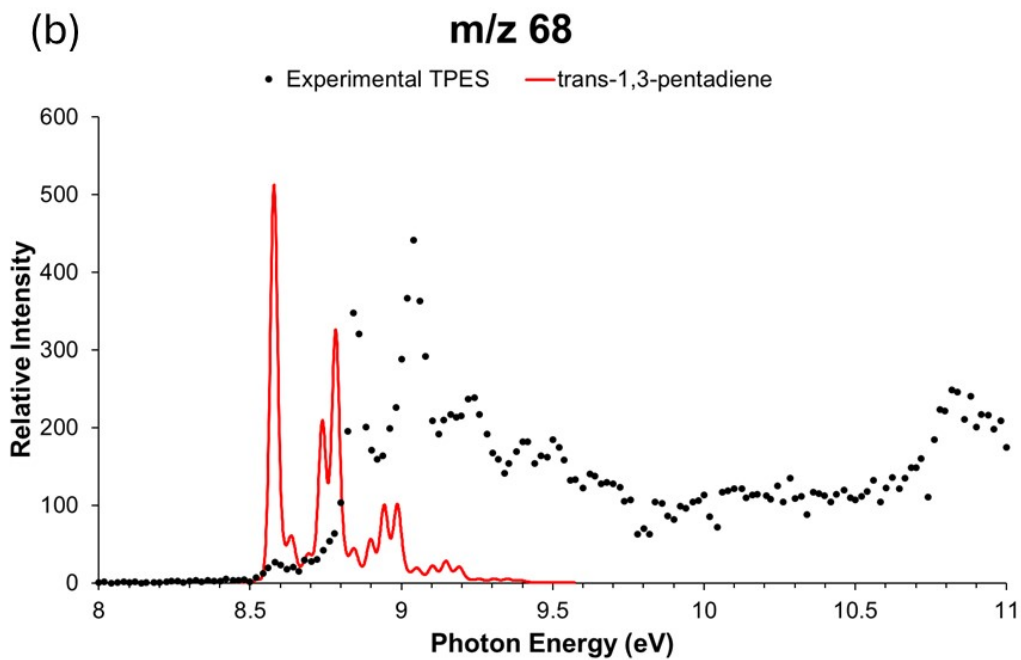

Fig. S3 Comparison of the FC simulation for (a) cis- and (b) trans-1,3-pentadiene with the experimental ms-TPES of m/z 68. The FC simulations were moved to the experimentally-reported IE values.<sup>42</sup>

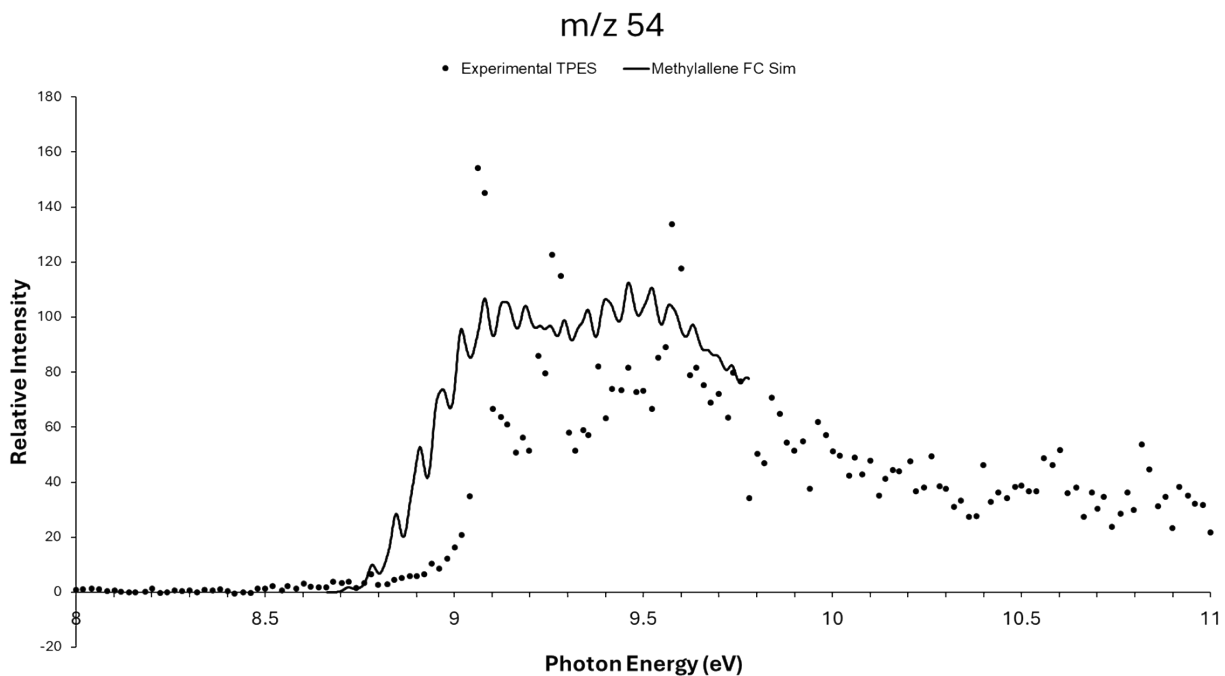

Figure S4. Comparison of the FC simulation for methylallene with the experimental ms-TPES of m/z 54

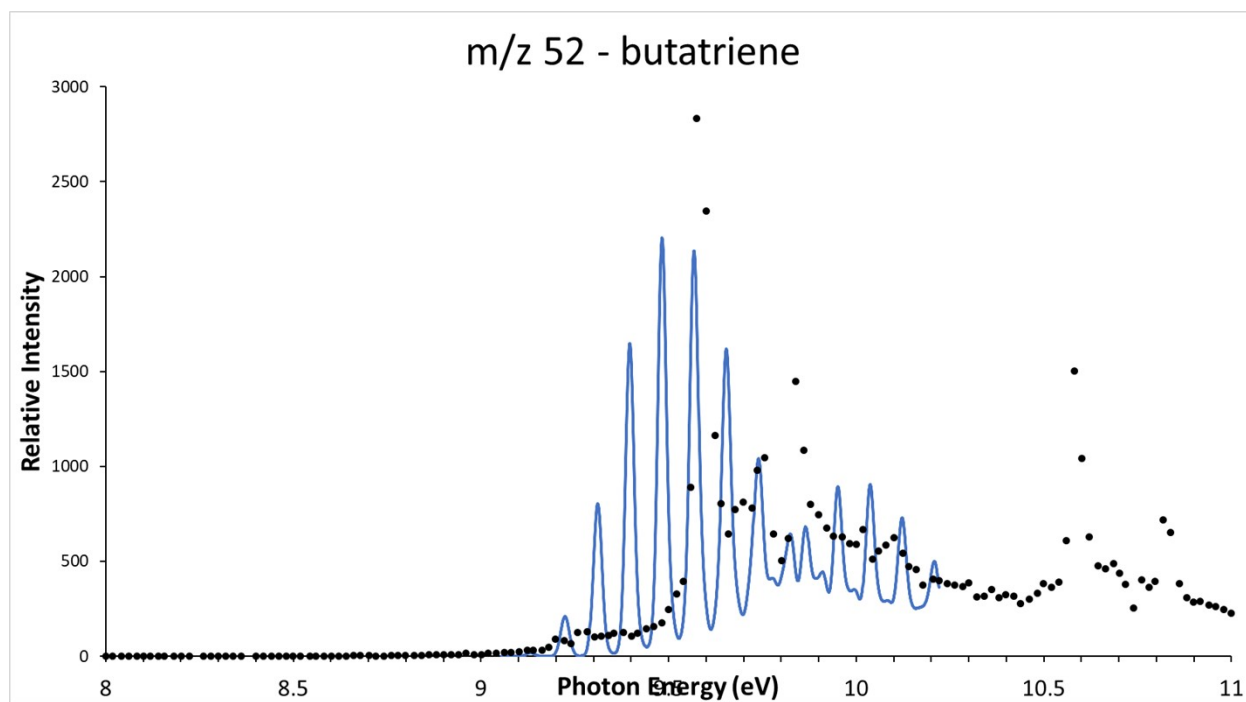

Figure S5. Comparison of the FC simulation for butatriene with the experimental ms-TPES of m/z 52

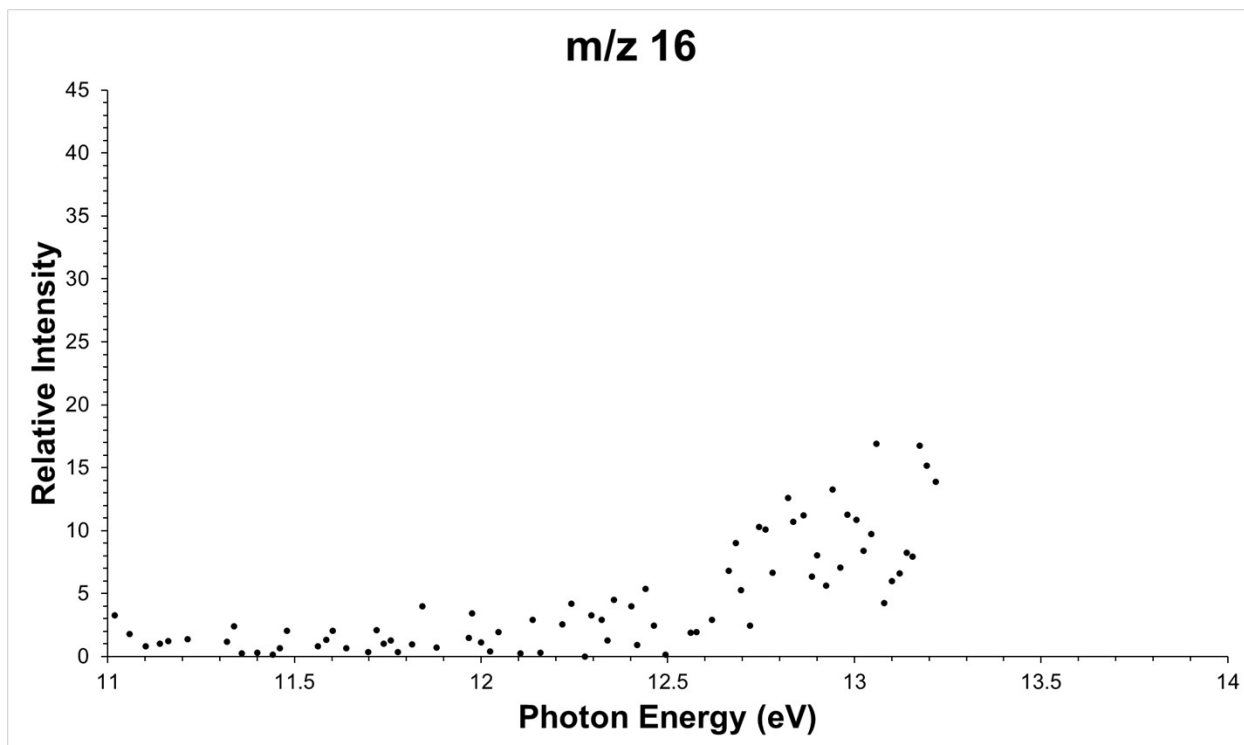

Figure S6. ms-TPES of m/z 16

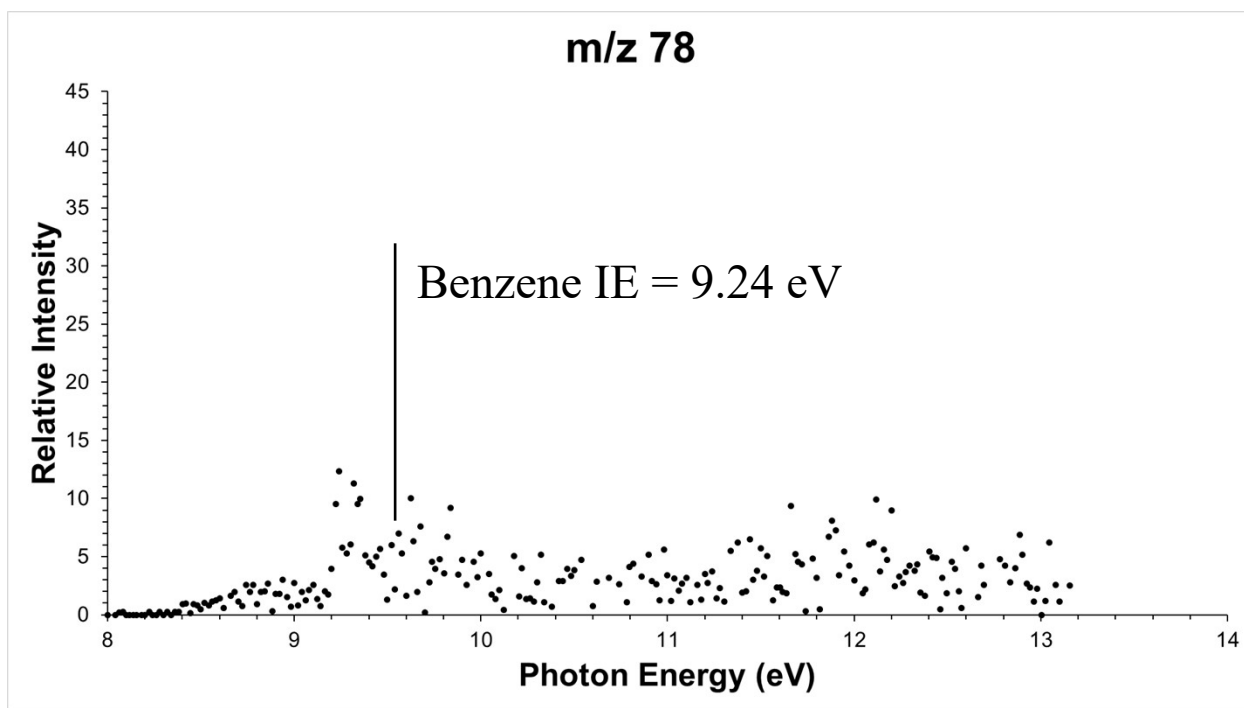

Figure S7. ms-TPES of m/z 78
